# Supplementary material for: Translational Impact of Nanoparticle–Drug Conjugate CRLX101 with or without Bevacizumab in Advanced Ovarian Cancer
Source: Oxford University Press journal article supplement (doi:10.1158/1078-0432.ccr-14-2810), 2014-12-19
Supplement: 10780432ccr142810-sup-137593_1_supp_2774589_ng7xfq.doc [file 10780432ccr142810-sup-137593_1_supp_2774589_ng7xfq.doc]

**Supplementary Information** for:

**Translational impact of nanoparticle-drug conjugate CRLX101 with or without bevacizumab in advanced ovarian cancer**

Elizabeth Pham1, Michael J. Birrer2, Scott Eliasof3, Edward Garmey3, Douglas Lazarus3, Christina R. Lee1, Shan Man1, Ursula Matulonis4, Christian G. Peters3, Ping Xu1, Carolyn N. Krasner2,*, Robert S. Kerbel1,5,*

**Authors’ Affiliations:**

1Biological Sciences Platform, Sunnybrook Research Institute, Toronto, Ontario, Canada

2Massachusetts General Hospital, Boston, MA, USA

3Cerulean Pharma Inc., Cambridge, MA, USA

4Dana-Farber Cancer Institute, Boston, MA, USA

5Department of Medical Biophysics, University of Toronto, Toronto, Ontario, Canada

***Co-Corresponding Authors:**

Dr. Robert S. Kerbel, Biological Sciences Platform, Sunnybrook Research Institute, S217 - 2075 Bayview Avenue, Toronto, Ontario, M4N 3M5, Canada. Phone: 1-416-480-5711; Fax: 1-416-480-5884; Email: [robert.kerbel@sri.utoronto.ca](mailto:robert.kerbel@sri.utoronto.ca)

Dr. Carolyn N. Krasner, Gillette Center of Gynecologic Oncology, Massachusetts General Hospital, Harvard Medical School, 55 Fruit Street, Boston, MA, 02114, United States. Phone: 1-617-724-4800; Fax: 1-617-726-1842; Email: [cndrasner@partners.org](mailto:cndrasner@partners.org)

**Supplementary Figure 1. CRLX101 decreases expression of HIF-1α, HIF-2α and downstream markers dependent on HIF-1α.** Tumor volumes of subcutaneous A2780 tumors treated with either a single administration of CRLX101 (6 mg/kg) or topotecan (10 mg/kg) (A). CRLX101 suppressed tumor growth more effectively compared to topotecan at these doses. While a single dose of CRLX101 was able to suppress HIF-1α (B) and HIF-2α (C) for more than a week, both gradually increased after day 9 post-treatment, consistent with the need for sustained drug exposure to continually inhibit HIF. (D) Several downstream markers of HIF-1α, including lactate dehydrogenase A (LDHA), hexokinase 2 (HK2), and phosphofructokinase (PFKP, platelet type) were also reduced with CRLX101 treatment. Primary antibodies: HIF-1α (Novus Biologicals, #NB100-479), HIF-2α (GeneTex, #GTX30123), and LDHA, HK2, and PFKP (Cell Signaling, Glycolysis Antibody Sampler Kit, #8337). Protein levels were normalized to actin levels and reported as percentage difference compared to vehicle (tumors isolated 72 hrs after vehicle injection). Error bars are SD (n=3 tumors per timepoint). (**p<0.05* compared to vehicle, ***p=0.08* compared to vehicle).

**Supplementary Figure 2. CRLX101 combined with Aflibercept shows improved anti-tumor efficacy.** Nude mice bearing subcutaneous A2780 tumors were treated with vehicle, aflibercept (25 mg/kg, twice weekly, Myoderm USA, Norristown, PA, USA), CRLX101 (5 mg/kg weekly) monotherapy and CRLX101 + aflibercept when tumors reached ~100 mm3. Mice were treated for 3 weeks (3 treatments of CRLX101 and 6 treatments of aflibercept administered). CRLX101 monotherapy resulted in a tumor growth delay of ~57 days. However, the combination of CRLX101 and aflibercept was significantly more efficacious (delay of >70 days) (A). This anti-tumor efficacy resulted in better survival (B). Median survival (in days): vehicle (11), aflibercept (18), CRLX101 (67, *p<0.01* compared to vehicle) and CRLX101 + aflibercept (>88, *p<0.001* compared to vehicle). (n = 10 mice per group). Tumors were isolated three days after 8 days of treatment and frozen on dry ice for subsequent western blots of whole tumor lysates. CRLX101 was able to inhibit HIF-1α protein levels and prevented aflibercept -induced increase in HIF-1α protein levels (C). (Error bars are SD, n = 4 tumors per group, **p<0.05* vs bevacizumab monotherapy)

**Supplementary Figure 3. CRLX101 combined with Pazopanib shows improved anti-tumor efficacy.** Nude mice bearing subcutaneous A2780 tumors were treated with vehicle, pazopanib (150 mg/kg, daily, LC Laboratories, Woburn, MA, USA), CRLX101 (5 mg/kg weekly) monotherapy and CRLX101 + pazopanib when tumors reached ~100 mm3. Mice were treated weekly for 3 weeks (3 treatments of CRLX101 and 21 treatments of pazopanib administered). CRLX101 monotherapy resulted in a tumor growth delay of ~32 days compared to vehicle. However, the combination of CRLX101 and pazopanib was significantly more efficacious (delay of 59 days compared to vehicle and 33 days compared to CRLX101 monotherapy) (A). This anti-tumor efficacy resulted in improved survival of mice (B). Median survival (in days): vehicle (9), pazopanib (13), CRLX101 (41, *p<0.01* compared to vehicle) and CRLX101 + pazopanib (79, *p<0.01* compared to vehicle). (n = 10 mice per group). Tumors were isolated three days after 8 days of treatment and frozen on dry ice for subsequent western blots of whole tumor lysates. CRLX101 was able to inhibit HIF-1α protein levels and prevented pazopanib -induced increase in HIF-1α protein levels (C). (Error bars are SD, n = 4 tumors per group, **p<0.05* vs bevacizumab monotherapy)

**Supplementary Figure 4. Determining the MTD for CRLX101 in CB-17 SCID mice.** Change in tumor burden of SKOV3-13 tumor-bearing SCID mice treated with 0, 2, 4, 8 and 12 mg/kg administered i.p. once weekly for 3 weeks. 12 mg/kg was not well tolerated, with 3 of 5 mice showing ~20% body weight loss after only 2 weeks of therapy. 8 mg/kg was established to be the estimated MTD for all subsequent studies. At 2 mg/kg, the bioluminescence signal was stably suppressed but at higher doses, the signal was reduced with each additional treatment. (Error bars are SD, n = 5 per group, *p<0.05* treated groups compared to vehicle at weeks 2 and 3 of therapy)

**Supplementary Figure 5. Bevacizumab slightly reduces uptake of CRLX101 into subcutaneous A2780 tumors.** Nude mice bearing subcutaneous A2780 tumors were treated with CRLX101 (6 mg/kg) simultaneously with bevacizumab (5 mg/kg) (A) or on Day 8 following one week of bevacizumab treatment (5 mg/kg, Day 1, 4, 8) (B). 24 hrs after administration of CRLX101, tumor homogenates were analyzed for CRLX101 using liquid chromatography – mass spectrometry (LC/MS). In both cases, uptake of CRLX101 was slightly reduced when adminstered with bevacizumab, however this was not statistically significant. Error bars are SD. (n = 3 tumors per group, CRLX101 content is expressed as ng CRLX101 per mg of tumor homogenate).

**Supplementary Methods**

***Immunohistochemistry***

Tumor masses in the abdominal cavity were collected, weighed, fixed in 10% formalin overnight and transferred to 70% ethanol. Tumor masses were paraffin-embedded and sectioned at 5 µm thickness. Slides were dewaxed in xylene and hydrated in graded alcohol. Heat-induced antigen retrieval using sodium citrate-citric acid (pH 6 for carbonic anhydrase IX (CAIX), caspase 3 and Ki67) or Tris-EDTA (pH 9 for CD31) and peroxidase quenching with 1% hydrogen peroxide were performed for all immunohistochemistry stainings. Blocking was done with Dako Protein Block (X0909) plus 20% normal donkey serum. Primary antibodies (goat anti-human CAIX, 1:125, R&D AF2188; rabbit anti-cleaved caspase-3, 1:500, Cell Signaling 5A1E; goat anti-PECAM-1 (M-20), 1:100, Santa Cruz sc-1506; rabbit anti-Ki67, 1:1000, Vector Laboratories VP-K451) were diluted in Dako Antibody Diluent (S3022) and slides were incubated overnight at 4oC. Dako LSAB+ System-HRP kit (K0690) and Liquid DAB+ Substrate Chromogen System (K3467) were used for detection. Tissue sections were counterstained with hematoxylin, dehydrated and mounted with Permount. Necrosis was assessed based on morphology of tumor sections stained with hematoxylin and eosin (H&E).

Tumor sections were visualized under a Carl Zeiss Axioplan2 microscope or an upright Leica DM LB2, with 10x objectives. Stainings were assessed on one section per tumor (n=4-5 mice per group) and images of the entire tumor area were captured for analysis using a Carl Zeiss AxioCam MRc or a Leica DFC300 FX camera (usually ~5-30 fields per slide, depending on the size of the tumor). Images were analyzed and quantified using ImageJ (<http://rsb.info.nih.gov/ij/>). All stainings were normalized to total tumor area (CAIX reported as percentage positive pixel; microvessel density (MVD, CD31) as vessel count; cleaved caspase-3 as cell count; Ki67 as cell count; H&E for necrotic area) and averaged (n=4-5 tumors per group). Since mice did not always have tumor masses present on the mesentery or omentum, but always presented tumors invading the pancreas, only tumor masses collected from the pancreas were used in the quantification for a fair comparison between therapy groups.

***Immunofluorescence***

Formalin-fixed paraffin-embedded tumor sections were steamed in the presence of the IHC-TEK epitope retrieval solution (IHC World) for 40 min and blocked overnight with 5% goat serum plus 1% BSA. Slides were incubated with HIF-1α (Novus Biologicals, #NB100-479) in IHC-Tek antibody diluent for 1 hr. The HIF signals were detected utilizing AlexaFluor-488 conjugated anti-mouse or anti-rabbit antibody (Life Technologies) for 1 hr at room temperature, counterstained with DAPI and mounted to glass coverslips using Aqua-Poly/Mount (Polysciences). Fluorescent micrographs were collected using an Olympus BX62 upright microscope equipped with an Uplan 10x objective and a Q-Imaging Rolera EM-C2 camera controlled by SlideBook 5.5.2 software.

***Western blot***

Subcutaneously-grown tumors were collected and snap frozen on dry ice. Tumors were thawed on ice in Cell Extraction Buffer (50mM Tris, 300mM NaCl, 10% glycerol, 3mM EDTA, 1mM MgCl2, 20mM B-glycerol, 25mM NaF, 1% Triton, 1mM PMSF, 1X protease inhibitor cocktail in water). Protein concentrations were measured using a BCA protein assay (Thermo Fisher). Samples were denatured using 2X sample buffer consisting of Bolt LDS Sample buffer, Bolt reducing agent (Life Technologies) in water and then heated to 95°C for 5 min. Protein samples were loaded at 20 μg/lane on to 4-12% Bolt Bis-Tris gel in 1X MES SDS Running buffer (Life Technologies) and separated at 165V using a Bolt apparatus (Life Technologies). Gels were soaked in 20% ethanol then dry transferred on to PVDF membrane using an iBlot apparatus (Life Technologies) at 20V. Membranes were blocked for 1 hr at room temperature with blocking buffer (LiCor, #927-40000). Primary antibodies: HIF-1α (1:2,000, Novus Biologics, #NB100-479), HIF-2α (1:100, GeneTex, #GTX30123), and actin (1:1000, Abcam, ab1801 or 1:1000 Santa Cruz Biologicals, SC-8432) were diluted in blocking buffer containing 0.2% Tween. Membranes were incubated overnight at 4°C. Blots were then washed in PBS containing 0.1% Tween at room temperature. Secondary antibodies (Licor): goat anti-rabbit-800CW, goat anti-mouse-800CW, goat anti-rabbit 680CW and goat anti-mouse 680 were used at 1:10,000 dilution, incubated in the dark for 35 minutes at room temperature. Blots were washed in PBS containing 0.1% Tween, followed by a PBS wash. Blots were dried and scanned using Odyssey CLx imaging system (Licor). Image analysis was completed using Image Studio Software (Licor). HIF levels were normalized to actin levels and reported as percentage difference compared to vehicle.
